# Supplementary material for: Isolated tooth reveals hidden spinosaurid dinosaur diversity in the British Wealden Supergroup (Lower Cretaceous)
Source: PeerJ journal article supplement (doi:10.7717/peerj.15453), 2023-05-31

# Supplementary information: Isolated teeth reveal hidden spinosaurid dinosaur diversity in the British Wealden Supergroup (Lower Cretaceous)

---

*Chris Tijani Barker, Darren Naish, Neil J. Gostling*

## 1. Analysis of HASMG G369a

### 1.1. Full measurements of HASMG G369a

Table S1. Measurements in millimetres (mm). Values based on reconstructed crown height (bold; see main text) marked with an asterisk (\*).

|                                     |             |
|-------------------------------------|-------------|
| Crown base length (CBL)             | 8.16        |
| Crown base width (CBW)              | 7.03        |
| <b>Crown height (CH)</b>            | <b>17.2</b> |
| Apical length (AL)                  | ?           |
| Crown angle (CA)                    | 74          |
| Crown base ratio (CBR)              | 0.86        |
| Crown height ratio (CHR)            | 2.1*        |
| Midcrown length (MCL)               | 5.67*       |
| Midcrown width (MCW)                | 4.54*       |
| Midcrown ratio (MCR)                | 0.8*        |
| Mesiobasal Denticle Extension (MDE) | ?           |
| Mesiobasal Carina Extension (MCE)   | ?           |
| Mesial Serrated Carina Length (MSL) | ?           |
| Distal Serrated Carina Length (DSL) | ?           |
| Mesial Carina Length (MCAL)         | ?           |
| Distal Carina Length (DCAL)         | ?           |
| Distal Denticle Height (DDH)        | 0.195*      |
| Distal Denticle Length (DDL)        | 0.171*      |
| Distal Denticle Width (DDW)         | 0.253*      |
| Mesial Denticle Height (MDH)        | ?           |

|                                        |       |
|----------------------------------------|-------|
| Mesial Denticle Length (MDL)           | ?     |
| Mesial Denticle Width (MDW)            | ?     |
| Distal Denticle Height Ratio (DHR)     | 1.14* |
| Distal Denticle Base Ratio (DBR)       | 1.48* |
| Mesial Denticle Height Ratio (MHR)     | ?     |
| Mesial Denticle Base Ratio (MBR)       | ?     |
| Distoapical Denticle Density (DA)      | ?     |
| Distocentral Denticle Density (DC)     | 35*   |
| Distobasal Denticle Density (DB)       | ?     |
| Mesioapical Denticle Density (MA)      | ?     |
| Mesiocentral Denticle Density (MC)     | 35*   |
| Mesiobasal Denticle Density (MB)       | ?     |
| Average Mesial Denticle Density (MAVG) | ?     |
| Average Distal Denticle Density (DAVG) | ?     |
| Denticle Size Density Index (DSDI)     | 1*    |
| Transverse Undulation Density (TUD)    | n/a   |
| Marginal Undulation Density (TUD)      | n/a   |
| Labial Flutes (LAF)                    | 7     |
| Lingual Flutes (LAF)                   | 5     |

## 1.2. Regression analyses

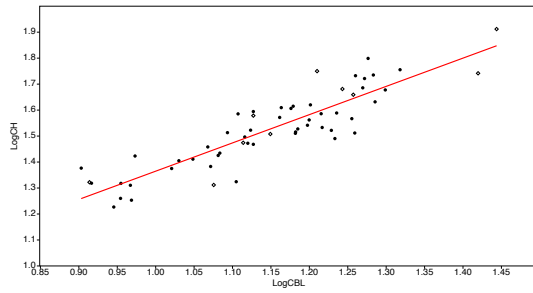

**All spinosaurids (all positions), LogCH vs. LogCBL.**  
Slope: 1.0881, intercept: 0.27671, r2: 0.79069.

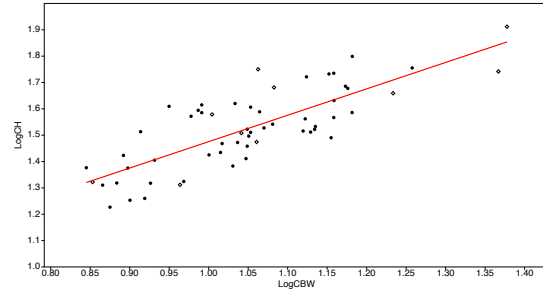

**All spinosaurids (all positions), LogCH vs. LogCBW.**  
Slope: 1.002, intercept: 0.47343, r2: 0.62588.

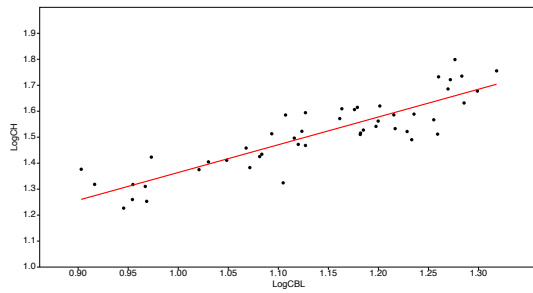

**Baryonychine spinosaurids (all positions), LogCH vs. LogCBL.**  
Slope: 1.0686, intercept: 0.29548, r2: 0.77314.

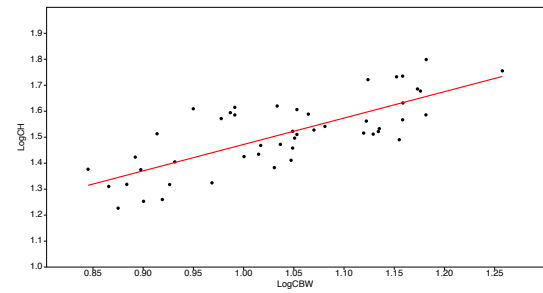

**Baryonychine spinosaurids (all positions), LogCH vs. LogCBW.**  
Slope: 1.0161, intercept: 0.45603, r2: 0.582.

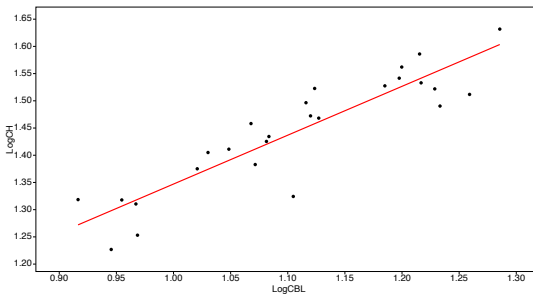

**Baryonyx (all positions), LogCH vs. LogCBL.**  
Slope: 0.89772, intercept: 0.44935, r2: 0.81304.

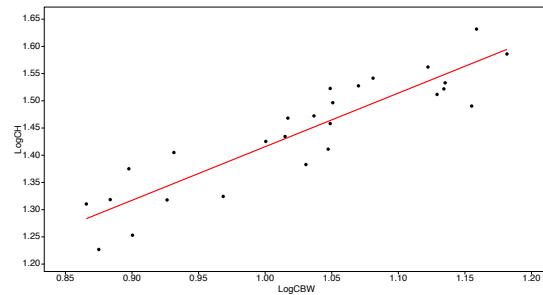

**Baryonyx (all positions), LogCH vs. LogCBW.**  
Slope: 0.9852, intercept: 0.43051, r2: 0.8198.

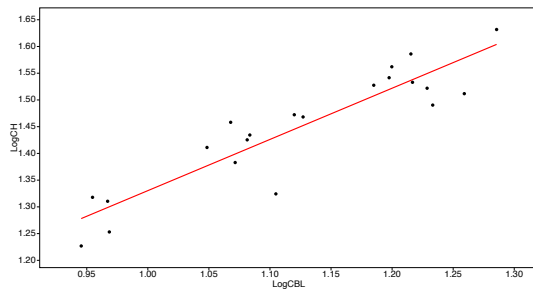

**Baryonyx (lateral teeth only), LogCH vs. LogCBL.**  
Slope: 0.95799, intercept: 0.37236, r2: 0.83866.

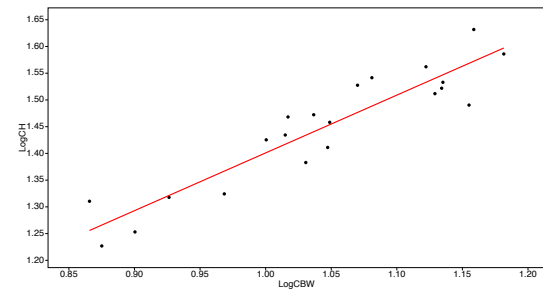

**Baryonyx (lateral teeth only), LogCH vs. LogCBW.**  
Slope: 1.0807, intercept: 0.32022, r2: 0.86066.

### 1.3. Full phylogenetic results

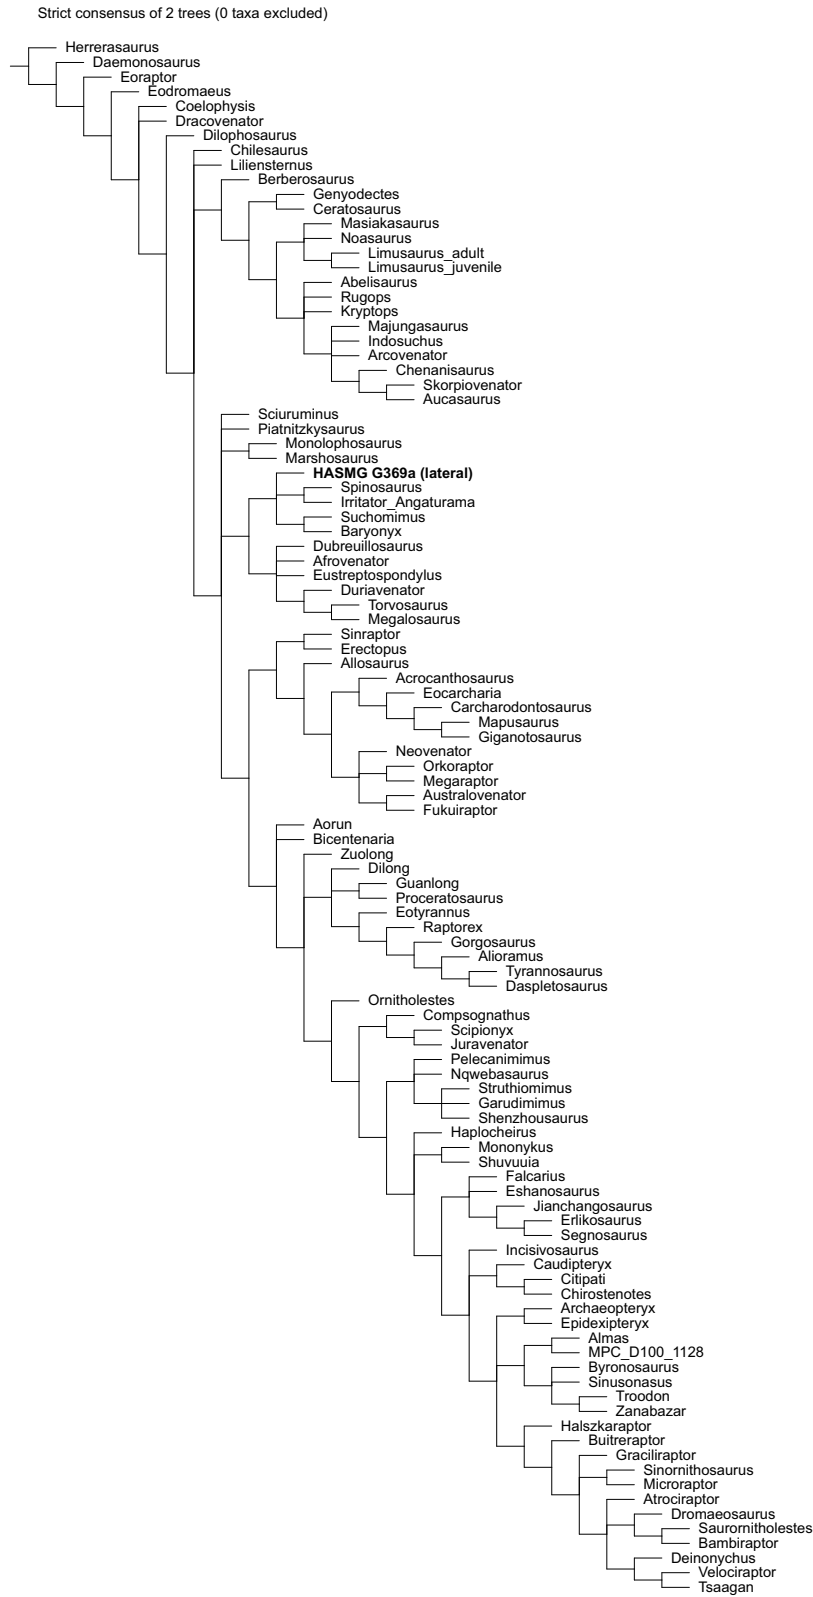

Fig S1 Strict consensus of the constrained analysis using the whole dentition dataset.



Strict consensus of 99999 trees (0 taxa excluded)

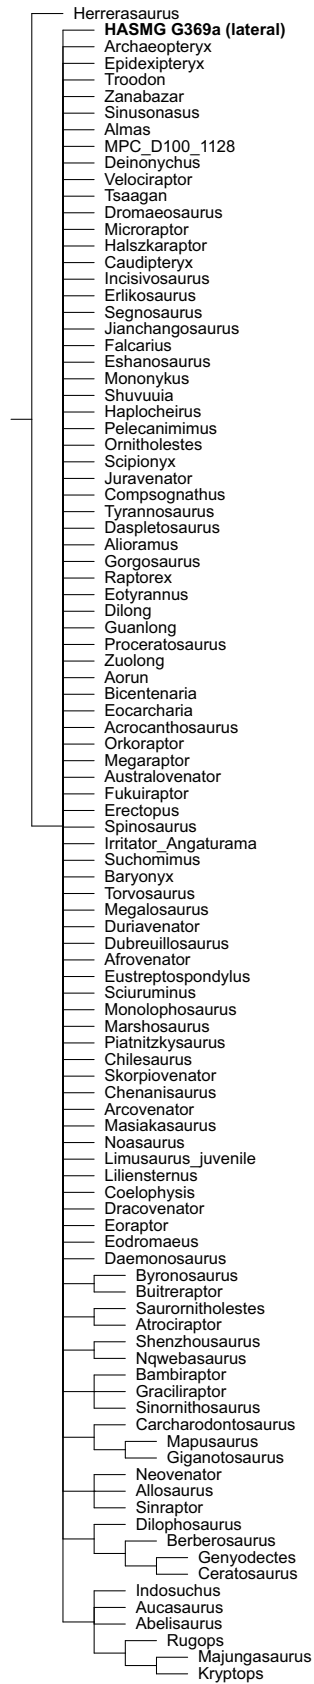

Fig S3 Strict consensus of the unconstrained analysis using the crown-only dataset.







| PC1 (%) | PC2 (%) | PC1 (%) | PC2 (%) | Axis 1 | Axis 2 | Axis 1 | Axis 2 |
|---------|---------|---------|---------|--------|--------|--------|--------|
| 50.89   | 19.86   | 41.04   | 21.57   | 5.7081 | 2.2272 | 18.374 | 9.6563 |
| 50.08   | 19.11   | 42.86   | 17.09   | 5.7905 | 2.2091 | 18.01  | 7.1806 |
| 57.04   | 21.78   | 41.07   | 24.73   | 12.239 | 4.6732 | 24.992 | 15.051 |
| 54.09   | 22.79   | 41.4    | 25.68   | 11.008 | 4.6388 | 23.75  | 14.731 |
| 37.97   | 31.01   | 35.48   | 27.85   | 1.9237 | 1.5713 | 6.2636 | 4.9158 |
| 39.64   | 30.5    | 36.25   | 22.59   | 2.2061 | 1.6975 | 6.0601 | 3.7752 |
| 48.45   | 27.08   | 54.31   | 18.43   | 2.2474 | 1.2559 | 12.99  | 4.4081 |
| 57.88   | 22.98   | 45.27   | 21.19   | 3.4446 | 1.3678 | 9.3725 | 4.3866 |

## 2.2. Cluster analyses: results

Table S3. Results of the cluster analyses on the various iterations of the pan-theropodan datasets, with XMDFEC V10010 treated as an unknown taxon.

| Dataset                                           | Cluster Analysis        |                                           |
|---------------------------------------------------|-------------------------|-------------------------------------------|
|                                                   | Hierarchical clustering | Neighbour joining                         |
| Whole dataset                                     | Abelisauridae indet.    | Abelisauridae indet. + <i>Fukuiraptor</i> |
| Whole dataset (no denticles = ?)                  | Abelisauridae indet.    | Abelisauridae indet. + <i>Fukuiraptor</i> |
| My dataset                                        | Abelisauridae indet.    | <i>Arcovenator</i>                        |
| My dataset (no denticles = ?)                     | Abelisauridae indet.    | Abelisauridae indet.                      |
| Whole dataset with large teeth                    | Abelisauridae indet.    | Abelisauridae indet.                      |
| Whole dataset with large teeth (no denticles = ?) | Abelisauridae indet.    | Abelisauridae indet. + <i>Fukuiraptor</i> |
| My dataset with large teeth                       | Abelisauridae indet.    | Abelisauridae indet.                      |
| My dataset with large teeth (no denticles = ?)    | Abelisauridae indet.    | Abelisauridae indet.                      |

### Whole dataset - Hierarchical clustering

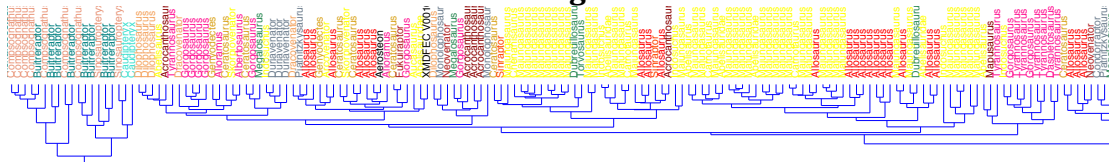

### Whole dataset (no denticles = ?) - Hierarchical clustering

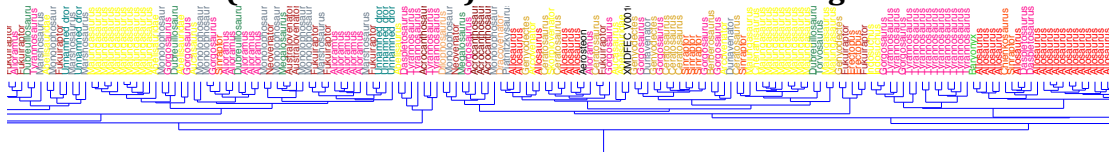

Supplement: Supplementary_information_v1.pdf [file Supplementary_information_v1.pdf]
